# Supplementary material for: PSC-db: A Structured and Searchable 3D-Database for Plant Secondary Compounds
Source: PubMed Central journal article supplement (PMC7924326; doi:10.3390/molecules26041124), 2021-02-20
Supplement: molecules-26-01124-s001.pdf [file molecules-26-01124-s001.pdf]

# PSC-db: A structured and searchable 3D-database for plant secondary compounds

Alejandro Valdés-Jiménez †, Carlos Peña-Varas †, Paola Borrego-Muñoz, Lily Arrue, Melissa Alegría-Arcos, Hussam Nour-Eldin, Ingo Dreyer, Gabriel Nuñez-Vivanco, David Ramírez\*

\* Correspondence: david.ramirez@uautonoma.cl; Tel.: +56 2 23036667

† These authors equally contributed to this work.

## Supplemental information

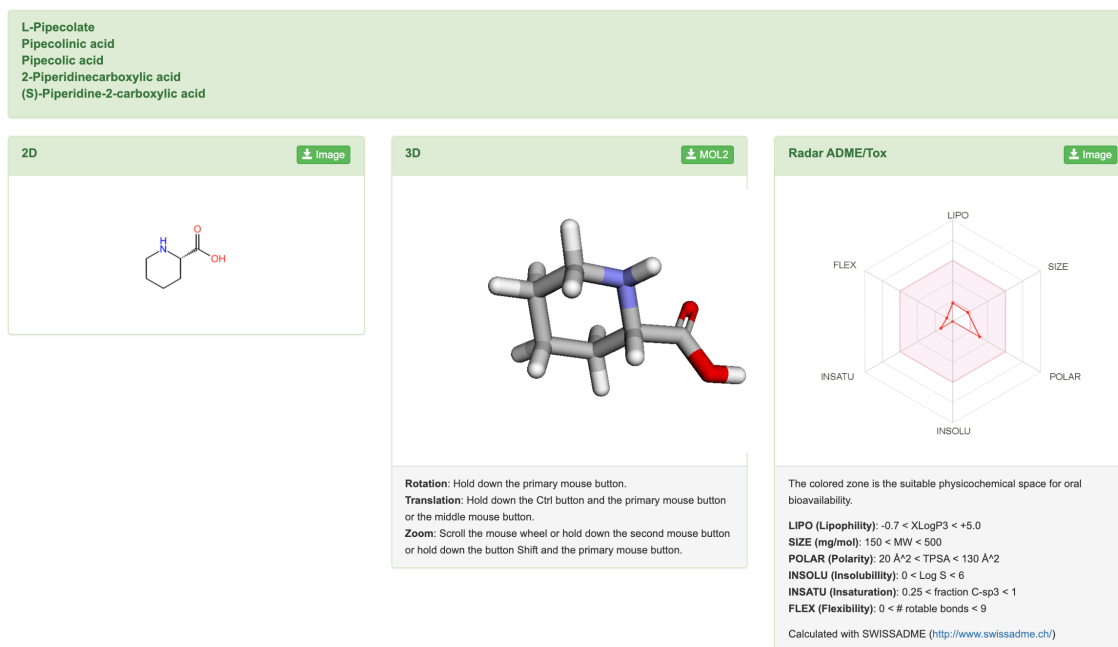

**Figure S1.** Illustrated record of PSC-db. A view of the 2D- and 3D-representation of a given molecule, as well as Bioavailability RADAR plotted with the predicted physicochemical and pharmaceutical features for the L-pipecolate alkaloid is shown.

|                                                                                                                                                                                                                                                                                                                                                                                                                      |                                                                                                                                                                                                                                                                                                                                                                                                                                                                                                   |
|----------------------------------------------------------------------------------------------------------------------------------------------------------------------------------------------------------------------------------------------------------------------------------------------------------------------------------------------------------------------------------------------------------------------|---------------------------------------------------------------------------------------------------------------------------------------------------------------------------------------------------------------------------------------------------------------------------------------------------------------------------------------------------------------------------------------------------------------------------------------------------------------------------------------------------|
| <p><b>A</b></p> <p>L-Pipecolate<br/>Pipecolic acid<br/>Pipecolic acid<br/>2-Piperidinecarboxylic acid<br/>(S)-Piperidine-2-carboxylic acid</p> <p>External Links   Hierarchical Organization   Physicochemical Properties   Lipophilicity</p> <p>Water Solubility   Pharmacokinetics   Druglikeness   Source Organism   Biological Activity</p> <p>NIKKAJI   PDB-CCD   KNApSAcK   PubChem   KEGG   ChEMBL   ZINC</p> | <p><b>B</b></p> <p>L-Pipecolate<br/>Pipecolic acid<br/>Pipecolic acid<br/>2-Piperidinecarboxylic acid<br/>(S)-Piperidine-2-carboxylic acid</p> <p>External Links   Hierarchical Organization   Physicochemical Properties   Lipophilicity</p> <p>Water Solubility   Pharmacokinetics   Druglikeness   Source Organism   Biological Activity</p> <p>[-&gt; Plant Secondary Compounds<br/>[-&gt; Alkaloids<br/>[-&gt;&gt; Alkaloids derived from lysine<br/>[-&gt;&gt;&gt; Piperidine alkaloids</p> |
|----------------------------------------------------------------------------------------------------------------------------------------------------------------------------------------------------------------------------------------------------------------------------------------------------------------------------------------------------------------------------------------------------------------------|---------------------------------------------------------------------------------------------------------------------------------------------------------------------------------------------------------------------------------------------------------------------------------------------------------------------------------------------------------------------------------------------------------------------------------------------------------------------------------------------------|

**Figure S2.** Record for the L-Pipecolate alkaloid is shown, with the names and alternative denominations, as well as the external links (A) and hierarchical organization (B).

|                                                                                                                                                                                                                                                                                                                                                                                                                                                                                                                                                                                                                                                                                                                                                                                                                                                                                                                                                                                                                                                                                                                                                                                                                                                                                                                                                                                                                                                                                                                                                                                                                                                                                                                                                                                        |                                     |      |                                |     |                               |      |                                    |                |                                  |      |                              |      |                                                                                                                                                                                                                                                                                                                                                                                                                                                                                                                                                                                                                                                                                                                                                                                                                                                                                                                                                                                                                                                      |       |           |                |                                                                                                                                                                                                                                                                                                                                                                                                                                                                                                                                                                                                                                                                                                                                                                                                                                                                                                                                                                                                                                                                                                                                                                                                                                                                                                                                                                                                                                                                                                                                                 |       |                               |        |                               |       |                  |         |                                                                                                                                                                                                                                                                                                                                                                                                                                                                                                                                                                                                                                                                                                                                                                                                                                                                                                                                                                                                                                                                                                                                                                                                                                                                                                                                                                                                                                                                                                                                                                                                                                                                                                                                                                                                                                                                                                                                                                                                                                                                                                                                                                                                                                                                                                                                                                                                                                                                                                                                    |                             |      |                      |       |                               |    |                                |    |                               |    |                               |    |                               |    |                 |       |
|----------------------------------------------------------------------------------------------------------------------------------------------------------------------------------------------------------------------------------------------------------------------------------------------------------------------------------------------------------------------------------------------------------------------------------------------------------------------------------------------------------------------------------------------------------------------------------------------------------------------------------------------------------------------------------------------------------------------------------------------------------------------------------------------------------------------------------------------------------------------------------------------------------------------------------------------------------------------------------------------------------------------------------------------------------------------------------------------------------------------------------------------------------------------------------------------------------------------------------------------------------------------------------------------------------------------------------------------------------------------------------------------------------------------------------------------------------------------------------------------------------------------------------------------------------------------------------------------------------------------------------------------------------------------------------------------------------------------------------------------------------------------------------------|-------------------------------------|------|--------------------------------|-----|-------------------------------|------|------------------------------------|----------------|----------------------------------|------|------------------------------|------|------------------------------------------------------------------------------------------------------------------------------------------------------------------------------------------------------------------------------------------------------------------------------------------------------------------------------------------------------------------------------------------------------------------------------------------------------------------------------------------------------------------------------------------------------------------------------------------------------------------------------------------------------------------------------------------------------------------------------------------------------------------------------------------------------------------------------------------------------------------------------------------------------------------------------------------------------------------------------------------------------------------------------------------------------|-------|-----------|----------------|-------------------------------------------------------------------------------------------------------------------------------------------------------------------------------------------------------------------------------------------------------------------------------------------------------------------------------------------------------------------------------------------------------------------------------------------------------------------------------------------------------------------------------------------------------------------------------------------------------------------------------------------------------------------------------------------------------------------------------------------------------------------------------------------------------------------------------------------------------------------------------------------------------------------------------------------------------------------------------------------------------------------------------------------------------------------------------------------------------------------------------------------------------------------------------------------------------------------------------------------------------------------------------------------------------------------------------------------------------------------------------------------------------------------------------------------------------------------------------------------------------------------------------------------------|-------|-------------------------------|--------|-------------------------------|-------|------------------|---------|------------------------------------------------------------------------------------------------------------------------------------------------------------------------------------------------------------------------------------------------------------------------------------------------------------------------------------------------------------------------------------------------------------------------------------------------------------------------------------------------------------------------------------------------------------------------------------------------------------------------------------------------------------------------------------------------------------------------------------------------------------------------------------------------------------------------------------------------------------------------------------------------------------------------------------------------------------------------------------------------------------------------------------------------------------------------------------------------------------------------------------------------------------------------------------------------------------------------------------------------------------------------------------------------------------------------------------------------------------------------------------------------------------------------------------------------------------------------------------------------------------------------------------------------------------------------------------------------------------------------------------------------------------------------------------------------------------------------------------------------------------------------------------------------------------------------------------------------------------------------------------------------------------------------------------------------------------------------------------------------------------------------------------------------------------------------------------------------------------------------------------------------------------------------------------------------------------------------------------------------------------------------------------------------------------------------------------------------------------------------------------------------------------------------------------------------------------------------------------------------------------------------------------|-----------------------------|------|----------------------|-------|-------------------------------|----|--------------------------------|----|-------------------------------|----|-------------------------------|----|-------------------------------|----|-----------------|-------|
| <p><b>A</b></p> <p>L-Pipecolate<br/>Pipecolic acid<br/>Pipecolic acid<br/>2-Piperidinecarboxylic acid<br/>(S)-Piperidine-2-carboxylic acid</p> <p>External Links   Hierarchical Organization   Physicochemical Properties   Lipophilicity</p> <p>Water Solubility   Pharmacokinetics   Druglikeness   Source Organism   Biological Activity</p> <table border="1"> <tr><td>Number of heavy atoms</td><td>9</td></tr> <tr><td>Number of aromatic heavy atoms</td><td>0</td></tr> <tr><td>Fraction Csp3</td><td>0.83</td></tr> <tr><td>Number of rotatable bonds</td><td>1</td></tr> <tr><td>Number of H-bond acceptors</td><td>3</td></tr> <tr><td>Number of H-bond donors</td><td>2</td></tr> <tr><td>Molar Refractivity</td><td>37.33</td></tr> <tr><td>TPSA</td><td>49.33</td></tr> </table> <p>TPSA: Topological Polar Surface Area. Calculated from Ertl P. et al. 2000 J. Med. Chem.<br/>Calculated with SWISSADME (<a href="http://www.swissadme.ch">http://www.swissadme.ch</a>)</p>                                                                                                                                                                                                                                                                                                                                                                                                                                                                                                                                                                                                                                                                                                                                                                                            | Number of heavy atoms               | 9    | Number of aromatic heavy atoms | 0   | Fraction Csp3                 | 0.83 | Number of rotatable bonds          | 1              | Number of H-bond acceptors       | 3    | Number of H-bond donors      | 2    | Molar Refractivity                                                                                                                                                                                                                                                                                                                                                                                                                                                                                                                                                                                                                                                                                                                                                                                                                                                                                                                                                                                                                                   | 37.33 | TPSA      | 49.33          | <p><b>B</b></p> <p>L-Pipecolate<br/>Pipecolic acid<br/>Pipecolic acid<br/>2-Piperidinecarboxylic acid<br/>(S)-Piperidine-2-carboxylic acid</p> <p>External Links   Hierarchical Organization   Physicochemical Properties   Lipophilicity</p> <p>Water Solubility   Pharmacokinetics   Druglikeness   Source Organism   Biological Activity</p> <table border="1"> <tr><td>lLOGP</td><td>1.16</td></tr> <tr><td>XLOGP3</td><td>-2.31</td></tr> <tr><td>WLOGP</td><td>-0.17</td></tr> <tr><td>MLOGP</td><td>-2.21</td></tr> <tr><td>SILICOS-IT</td><td>0.46</td></tr> <tr><td>Consensus Log P(o/w)</td><td>-0.61</td></tr> </table> <p>lLOGP: In-house physics-based method implemented from Daina A et al. 2014 J. Chem. Inf. Model.<br/>XLOGP3: Atomistic and knowledge-based method calculated by XLOGP program, version 3.2.2, courtesy of CCBG, Shanghai Institute of Organic Chemistry<br/>WLOGP: Atomistic method implemented from Wildman SA and Crippen GM. 1999 J. Chem. Inf. Model.<br/>MLOGP: Topological method implemented from Moriguchi I. et al. 1992 Chem. Pharm. Bull. Moriguchi I. et al. 1994 Chem. Pharm. Bull. Lipinski PA. et al. 2001 Adv. Drug. Deliv. Rev.<br/>SILICOS-IT: Hybrid fragmental/topological method calculated by FILTER-IT program, version 1.0.2, courtesy of SILICOS-IT, <a href="http://www.silicos-it.com">http://www.silicos-it.com</a><br/>Consensus Log P(o/w): Average of all five predictions<br/>Calculated with SWISSADME (<a href="http://www.swissadme.ch">http://www.swissadme.ch</a>)</p> | lLOGP | 1.16                          | XLOGP3 | -2.31                         | WLOGP | -0.17            | MLOGP   | -2.21                                                                                                                                                                                                                                                                                                                                                                                                                                                                                                                                                                                                                                                                                                                                                                                                                                                                                                                                                                                                                                                                                                                                                                                                                                                                                                                                                                                                                                                                                                                                                                                                                                                                                                                                                                                                                                                                                                                                                                                                                                                                                                                                                                                                                                                                                                                                                                                                                                                                                                                              | SILICOS-IT                  | 0.46 | Consensus Log P(o/w) | -0.61 |                               |    |                                |    |                               |    |                               |    |                               |    |                 |       |
| Number of heavy atoms                                                                                                                                                                                                                                                                                                                                                                                                                                                                                                                                                                                                                                                                                                                                                                                                                                                                                                                                                                                                                                                                                                                                                                                                                                                                                                                                                                                                                                                                                                                                                                                                                                                                                                                                                                  | 9                                   |      |                                |     |                               |      |                                    |                |                                  |      |                              |      |                                                                                                                                                                                                                                                                                                                                                                                                                                                                                                                                                                                                                                                                                                                                                                                                                                                                                                                                                                                                                                                      |       |           |                |                                                                                                                                                                                                                                                                                                                                                                                                                                                                                                                                                                                                                                                                                                                                                                                                                                                                                                                                                                                                                                                                                                                                                                                                                                                                                                                                                                                                                                                                                                                                                 |       |                               |        |                               |       |                  |         |                                                                                                                                                                                                                                                                                                                                                                                                                                                                                                                                                                                                                                                                                                                                                                                                                                                                                                                                                                                                                                                                                                                                                                                                                                                                                                                                                                                                                                                                                                                                                                                                                                                                                                                                                                                                                                                                                                                                                                                                                                                                                                                                                                                                                                                                                                                                                                                                                                                                                                                                    |                             |      |                      |       |                               |    |                                |    |                               |    |                               |    |                               |    |                 |       |
| Number of aromatic heavy atoms                                                                                                                                                                                                                                                                                                                                                                                                                                                                                                                                                                                                                                                                                                                                                                                                                                                                                                                                                                                                                                                                                                                                                                                                                                                                                                                                                                                                                                                                                                                                                                                                                                                                                                                                                         | 0                                   |      |                                |     |                               |      |                                    |                |                                  |      |                              |      |                                                                                                                                                                                                                                                                                                                                                                                                                                                                                                                                                                                                                                                                                                                                                                                                                                                                                                                                                                                                                                                      |       |           |                |                                                                                                                                                                                                                                                                                                                                                                                                                                                                                                                                                                                                                                                                                                                                                                                                                                                                                                                                                                                                                                                                                                                                                                                                                                                                                                                                                                                                                                                                                                                                                 |       |                               |        |                               |       |                  |         |                                                                                                                                                                                                                                                                                                                                                                                                                                                                                                                                                                                                                                                                                                                                                                                                                                                                                                                                                                                                                                                                                                                                                                                                                                                                                                                                                                                                                                                                                                                                                                                                                                                                                                                                                                                                                                                                                                                                                                                                                                                                                                                                                                                                                                                                                                                                                                                                                                                                                                                                    |                             |      |                      |       |                               |    |                                |    |                               |    |                               |    |                               |    |                 |       |
| Fraction Csp3                                                                                                                                                                                                                                                                                                                                                                                                                                                                                                                                                                                                                                                                                                                                                                                                                                                                                                                                                                                                                                                                                                                                                                                                                                                                                                                                                                                                                                                                                                                                                                                                                                                                                                                                                                          | 0.83                                |      |                                |     |                               |      |                                    |                |                                  |      |                              |      |                                                                                                                                                                                                                                                                                                                                                                                                                                                                                                                                                                                                                                                                                                                                                                                                                                                                                                                                                                                                                                                      |       |           |                |                                                                                                                                                                                                                                                                                                                                                                                                                                                                                                                                                                                                                                                                                                                                                                                                                                                                                                                                                                                                                                                                                                                                                                                                                                                                                                                                                                                                                                                                                                                                                 |       |                               |        |                               |       |                  |         |                                                                                                                                                                                                                                                                                                                                                                                                                                                                                                                                                                                                                                                                                                                                                                                                                                                                                                                                                                                                                                                                                                                                                                                                                                                                                                                                                                                                                                                                                                                                                                                                                                                                                                                                                                                                                                                                                                                                                                                                                                                                                                                                                                                                                                                                                                                                                                                                                                                                                                                                    |                             |      |                      |       |                               |    |                                |    |                               |    |                               |    |                               |    |                 |       |
| Number of rotatable bonds                                                                                                                                                                                                                                                                                                                                                                                                                                                                                                                                                                                                                                                                                                                                                                                                                                                                                                                                                                                                                                                                                                                                                                                                                                                                                                                                                                                                                                                                                                                                                                                                                                                                                                                                                              | 1                                   |      |                                |     |                               |      |                                    |                |                                  |      |                              |      |                                                                                                                                                                                                                                                                                                                                                                                                                                                                                                                                                                                                                                                                                                                                                                                                                                                                                                                                                                                                                                                      |       |           |                |                                                                                                                                                                                                                                                                                                                                                                                                                                                                                                                                                                                                                                                                                                                                                                                                                                                                                                                                                                                                                                                                                                                                                                                                                                                                                                                                                                                                                                                                                                                                                 |       |                               |        |                               |       |                  |         |                                                                                                                                                                                                                                                                                                                                                                                                                                                                                                                                                                                                                                                                                                                                                                                                                                                                                                                                                                                                                                                                                                                                                                                                                                                                                                                                                                                                                                                                                                                                                                                                                                                                                                                                                                                                                                                                                                                                                                                                                                                                                                                                                                                                                                                                                                                                                                                                                                                                                                                                    |                             |      |                      |       |                               |    |                                |    |                               |    |                               |    |                               |    |                 |       |
| Number of H-bond acceptors                                                                                                                                                                                                                                                                                                                                                                                                                                                                                                                                                                                                                                                                                                                                                                                                                                                                                                                                                                                                                                                                                                                                                                                                                                                                                                                                                                                                                                                                                                                                                                                                                                                                                                                                                             | 3                                   |      |                                |     |                               |      |                                    |                |                                  |      |                              |      |                                                                                                                                                                                                                                                                                                                                                                                                                                                                                                                                                                                                                                                                                                                                                                                                                                                                                                                                                                                                                                                      |       |           |                |                                                                                                                                                                                                                                                                                                                                                                                                                                                                                                                                                                                                                                                                                                                                                                                                                                                                                                                                                                                                                                                                                                                                                                                                                                                                                                                                                                                                                                                                                                                                                 |       |                               |        |                               |       |                  |         |                                                                                                                                                                                                                                                                                                                                                                                                                                                                                                                                                                                                                                                                                                                                                                                                                                                                                                                                                                                                                                                                                                                                                                                                                                                                                                                                                                                                                                                                                                                                                                                                                                                                                                                                                                                                                                                                                                                                                                                                                                                                                                                                                                                                                                                                                                                                                                                                                                                                                                                                    |                             |      |                      |       |                               |    |                                |    |                               |    |                               |    |                               |    |                 |       |
| Number of H-bond donors                                                                                                                                                                                                                                                                                                                                                                                                                                                                                                                                                                                                                                                                                                                                                                                                                                                                                                                                                                                                                                                                                                                                                                                                                                                                                                                                                                                                                                                                                                                                                                                                                                                                                                                                                                | 2                                   |      |                                |     |                               |      |                                    |                |                                  |      |                              |      |                                                                                                                                                                                                                                                                                                                                                                                                                                                                                                                                                                                                                                                                                                                                                                                                                                                                                                                                                                                                                                                      |       |           |                |                                                                                                                                                                                                                                                                                                                                                                                                                                                                                                                                                                                                                                                                                                                                                                                                                                                                                                                                                                                                                                                                                                                                                                                                                                                                                                                                                                                                                                                                                                                                                 |       |                               |        |                               |       |                  |         |                                                                                                                                                                                                                                                                                                                                                                                                                                                                                                                                                                                                                                                                                                                                                                                                                                                                                                                                                                                                                                                                                                                                                                                                                                                                                                                                                                                                                                                                                                                                                                                                                                                                                                                                                                                                                                                                                                                                                                                                                                                                                                                                                                                                                                                                                                                                                                                                                                                                                                                                    |                             |      |                      |       |                               |    |                                |    |                               |    |                               |    |                               |    |                 |       |
| Molar Refractivity                                                                                                                                                                                                                                                                                                                                                                                                                                                                                                                                                                                                                                                                                                                                                                                                                                                                                                                                                                                                                                                                                                                                                                                                                                                                                                                                                                                                                                                                                                                                                                                                                                                                                                                                                                     | 37.33                               |      |                                |     |                               |      |                                    |                |                                  |      |                              |      |                                                                                                                                                                                                                                                                                                                                                                                                                                                                                                                                                                                                                                                                                                                                                                                                                                                                                                                                                                                                                                                      |       |           |                |                                                                                                                                                                                                                                                                                                                                                                                                                                                                                                                                                                                                                                                                                                                                                                                                                                                                                                                                                                                                                                                                                                                                                                                                                                                                                                                                                                                                                                                                                                                                                 |       |                               |        |                               |       |                  |         |                                                                                                                                                                                                                                                                                                                                                                                                                                                                                                                                                                                                                                                                                                                                                                                                                                                                                                                                                                                                                                                                                                                                                                                                                                                                                                                                                                                                                                                                                                                                                                                                                                                                                                                                                                                                                                                                                                                                                                                                                                                                                                                                                                                                                                                                                                                                                                                                                                                                                                                                    |                             |      |                      |       |                               |    |                                |    |                               |    |                               |    |                               |    |                 |       |
| TPSA                                                                                                                                                                                                                                                                                                                                                                                                                                                                                                                                                                                                                                                                                                                                                                                                                                                                                                                                                                                                                                                                                                                                                                                                                                                                                                                                                                                                                                                                                                                                                                                                                                                                                                                                                                                   | 49.33                               |      |                                |     |                               |      |                                    |                |                                  |      |                              |      |                                                                                                                                                                                                                                                                                                                                                                                                                                                                                                                                                                                                                                                                                                                                                                                                                                                                                                                                                                                                                                                      |       |           |                |                                                                                                                                                                                                                                                                                                                                                                                                                                                                                                                                                                                                                                                                                                                                                                                                                                                                                                                                                                                                                                                                                                                                                                                                                                                                                                                                                                                                                                                                                                                                                 |       |                               |        |                               |       |                  |         |                                                                                                                                                                                                                                                                                                                                                                                                                                                                                                                                                                                                                                                                                                                                                                                                                                                                                                                                                                                                                                                                                                                                                                                                                                                                                                                                                                                                                                                                                                                                                                                                                                                                                                                                                                                                                                                                                                                                                                                                                                                                                                                                                                                                                                                                                                                                                                                                                                                                                                                                    |                             |      |                      |       |                               |    |                                |    |                               |    |                               |    |                               |    |                 |       |
| lLOGP                                                                                                                                                                                                                                                                                                                                                                                                                                                                                                                                                                                                                                                                                                                                                                                                                                                                                                                                                                                                                                                                                                                                                                                                                                                                                                                                                                                                                                                                                                                                                                                                                                                                                                                                                                                  | 1.16                                |      |                                |     |                               |      |                                    |                |                                  |      |                              |      |                                                                                                                                                                                                                                                                                                                                                                                                                                                                                                                                                                                                                                                                                                                                                                                                                                                                                                                                                                                                                                                      |       |           |                |                                                                                                                                                                                                                                                                                                                                                                                                                                                                                                                                                                                                                                                                                                                                                                                                                                                                                                                                                                                                                                                                                                                                                                                                                                                                                                                                                                                                                                                                                                                                                 |       |                               |        |                               |       |                  |         |                                                                                                                                                                                                                                                                                                                                                                                                                                                                                                                                                                                                                                                                                                                                                                                                                                                                                                                                                                                                                                                                                                                                                                                                                                                                                                                                                                                                                                                                                                                                                                                                                                                                                                                                                                                                                                                                                                                                                                                                                                                                                                                                                                                                                                                                                                                                                                                                                                                                                                                                    |                             |      |                      |       |                               |    |                                |    |                               |    |                               |    |                               |    |                 |       |
| XLOGP3                                                                                                                                                                                                                                                                                                                                                                                                                                                                                                                                                                                                                                                                                                                                                                                                                                                                                                                                                                                                                                                                                                                                                                                                                                                                                                                                                                                                                                                                                                                                                                                                                                                                                                                                                                                 | -2.31                               |      |                                |     |                               |      |                                    |                |                                  |      |                              |      |                                                                                                                                                                                                                                                                                                                                                                                                                                                                                                                                                                                                                                                                                                                                                                                                                                                                                                                                                                                                                                                      |       |           |                |                                                                                                                                                                                                                                                                                                                                                                                                                                                                                                                                                                                                                                                                                                                                                                                                                                                                                                                                                                                                                                                                                                                                                                                                                                                                                                                                                                                                                                                                                                                                                 |       |                               |        |                               |       |                  |         |                                                                                                                                                                                                                                                                                                                                                                                                                                                                                                                                                                                                                                                                                                                                                                                                                                                                                                                                                                                                                                                                                                                                                                                                                                                                                                                                                                                                                                                                                                                                                                                                                                                                                                                                                                                                                                                                                                                                                                                                                                                                                                                                                                                                                                                                                                                                                                                                                                                                                                                                    |                             |      |                      |       |                               |    |                                |    |                               |    |                               |    |                               |    |                 |       |
| WLOGP                                                                                                                                                                                                                                                                                                                                                                                                                                                                                                                                                                                                                                                                                                                                                                                                                                                                                                                                                                                                                                                                                                                                                                                                                                                                                                                                                                                                                                                                                                                                                                                                                                                                                                                                                                                  | -0.17                               |      |                                |     |                               |      |                                    |                |                                  |      |                              |      |                                                                                                                                                                                                                                                                                                                                                                                                                                                                                                                                                                                                                                                                                                                                                                                                                                                                                                                                                                                                                                                      |       |           |                |                                                                                                                                                                                                                                                                                                                                                                                                                                                                                                                                                                                                                                                                                                                                                                                                                                                                                                                                                                                                                                                                                                                                                                                                                                                                                                                                                                                                                                                                                                                                                 |       |                               |        |                               |       |                  |         |                                                                                                                                                                                                                                                                                                                                                                                                                                                                                                                                                                                                                                                                                                                                                                                                                                                                                                                                                                                                                                                                                                                                                                                                                                                                                                                                                                                                                                                                                                                                                                                                                                                                                                                                                                                                                                                                                                                                                                                                                                                                                                                                                                                                                                                                                                                                                                                                                                                                                                                                    |                             |      |                      |       |                               |    |                                |    |                               |    |                               |    |                               |    |                 |       |
| MLOGP                                                                                                                                                                                                                                                                                                                                                                                                                                                                                                                                                                                                                                                                                                                                                                                                                                                                                                                                                                                                                                                                                                                                                                                                                                                                                                                                                                                                                                                                                                                                                                                                                                                                                                                                                                                  | -2.21                               |      |                                |     |                               |      |                                    |                |                                  |      |                              |      |                                                                                                                                                                                                                                                                                                                                                                                                                                                                                                                                                                                                                                                                                                                                                                                                                                                                                                                                                                                                                                                      |       |           |                |                                                                                                                                                                                                                                                                                                                                                                                                                                                                                                                                                                                                                                                                                                                                                                                                                                                                                                                                                                                                                                                                                                                                                                                                                                                                                                                                                                                                                                                                                                                                                 |       |                               |        |                               |       |                  |         |                                                                                                                                                                                                                                                                                                                                                                                                                                                                                                                                                                                                                                                                                                                                                                                                                                                                                                                                                                                                                                                                                                                                                                                                                                                                                                                                                                                                                                                                                                                                                                                                                                                                                                                                                                                                                                                                                                                                                                                                                                                                                                                                                                                                                                                                                                                                                                                                                                                                                                                                    |                             |      |                      |       |                               |    |                                |    |                               |    |                               |    |                               |    |                 |       |
| SILICOS-IT                                                                                                                                                                                                                                                                                                                                                                                                                                                                                                                                                                                                                                                                                                                                                                                                                                                                                                                                                                                                                                                                                                                                                                                                                                                                                                                                                                                                                                                                                                                                                                                                                                                                                                                                                                             | 0.46                                |      |                                |     |                               |      |                                    |                |                                  |      |                              |      |                                                                                                                                                                                                                                                                                                                                                                                                                                                                                                                                                                                                                                                                                                                                                                                                                                                                                                                                                                                                                                                      |       |           |                |                                                                                                                                                                                                                                                                                                                                                                                                                                                                                                                                                                                                                                                                                                                                                                                                                                                                                                                                                                                                                                                                                                                                                                                                                                                                                                                                                                                                                                                                                                                                                 |       |                               |        |                               |       |                  |         |                                                                                                                                                                                                                                                                                                                                                                                                                                                                                                                                                                                                                                                                                                                                                                                                                                                                                                                                                                                                                                                                                                                                                                                                                                                                                                                                                                                                                                                                                                                                                                                                                                                                                                                                                                                                                                                                                                                                                                                                                                                                                                                                                                                                                                                                                                                                                                                                                                                                                                                                    |                             |      |                      |       |                               |    |                                |    |                               |    |                               |    |                               |    |                 |       |
| Consensus Log P(o/w)                                                                                                                                                                                                                                                                                                                                                                                                                                                                                                                                                                                                                                                                                                                                                                                                                                                                                                                                                                                                                                                                                                                                                                                                                                                                                                                                                                                                                                                                                                                                                                                                                                                                                                                                                                   | -0.61                               |      |                                |     |                               |      |                                    |                |                                  |      |                              |      |                                                                                                                                                                                                                                                                                                                                                                                                                                                                                                                                                                                                                                                                                                                                                                                                                                                                                                                                                                                                                                                      |       |           |                |                                                                                                                                                                                                                                                                                                                                                                                                                                                                                                                                                                                                                                                                                                                                                                                                                                                                                                                                                                                                                                                                                                                                                                                                                                                                                                                                                                                                                                                                                                                                                 |       |                               |        |                               |       |                  |         |                                                                                                                                                                                                                                                                                                                                                                                                                                                                                                                                                                                                                                                                                                                                                                                                                                                                                                                                                                                                                                                                                                                                                                                                                                                                                                                                                                                                                                                                                                                                                                                                                                                                                                                                                                                                                                                                                                                                                                                                                                                                                                                                                                                                                                                                                                                                                                                                                                                                                                                                    |                             |      |                      |       |                               |    |                                |    |                               |    |                               |    |                               |    |                 |       |
| <p><b>C</b></p> <p>L-Pipecolate<br/>Pipecolic acid<br/>Pipecolic acid<br/>2-Piperidinecarboxylic acid<br/>(S)-Piperidine-2-carboxylic acid</p> <p>External Links   Hierarchical Organization   Physicochemical Properties   Lipophilicity</p> <p>Water Solubility   Pharmacokinetics   Druglikeness   Source Organism   Biological Activity</p> <table border="1"> <tr><td>ESOL Log S</td><td>0.88</td></tr> <tr><td>ESOL Solubility (mg/mL)</td><td>981</td></tr> <tr><td>ESOL Solubility (mol/L)</td><td>7.59</td></tr> <tr><td>ESOL Class</td><td>Highly soluble</td></tr> <tr><td>ALI Log S</td><td>1.81</td></tr> <tr><td>ALI Solubility (mg/mL)</td><td>8340</td></tr> <tr><td>ALI Solubility (mol/L)</td><td>64.6</td></tr> <tr><td>ALI Class</td><td>Highly soluble</td></tr> <tr><td>SILICOS-IT Log S</td><td>-0.42</td></tr> <tr><td>SILICOS-IT Solubility (mg/mL)</td><td>48.5</td></tr> <tr><td>SILICOS-IT Solubility (mol/L)</td><td>0.376</td></tr> <tr><td>SILICOS-IT Class</td><td>Soluble</td></tr> </table> <p>ESOL: Topological method implemented from Delaney JS. 2004 J. Chem. Inf. Model.<br/>Solubility class: Log S scale Insoluble &lt; -10 &lt; Poorly &lt; -6 &lt; Moderately &lt; -4 &lt; Soluble &lt; -2 Very &lt; 0 &lt; Highly<br/>ALI: Topological method implemented from Ali J. et al. 2012 J. Chem. Inf. Model.<br/>SILICOS-IT: Fragmental method calculated by FILTER-IT program, version 1.0.2, courtesy of SILICOS-IT, <a href="http://www.silicos-it.com">http://www.silicos-it.com</a><br/>Calculated with SWISSADME (<a href="http://www.swissadme.ch">http://www.swissadme.ch</a>)</p>                                                                                                                                                      | ESOL Log S                          | 0.88 | ESOL Solubility (mg/mL)        | 981 | ESOL Solubility (mol/L)       | 7.59 | ESOL Class                         | Highly soluble | ALI Log S                        | 1.81 | ALI Solubility (mg/mL)       | 8340 | ALI Solubility (mol/L)                                                                                                                                                                                                                                                                                                                                                                                                                                                                                                                                                                                                                                                                                                                                                                                                                                                                                                                                                                                                                               | 64.6  | ALI Class | Highly soluble | SILICOS-IT Log S                                                                                                                                                                                                                                                                                                                                                                                                                                                                                                                                                                                                                                                                                                                                                                                                                                                                                                                                                                                                                                                                                                                                                                                                                                                                                                                                                                                                                                                                                                                                | -0.42 | SILICOS-IT Solubility (mg/mL) | 48.5   | SILICOS-IT Solubility (mol/L) | 0.376 | SILICOS-IT Class | Soluble | <p><b>D</b></p> <p>L-Pipecolate<br/>Pipecolic acid<br/>Pipecolic acid<br/>2-Piperidinecarboxylic acid<br/>(S)-Piperidine-2-carboxylic acid</p> <p>External Links   Hierarchical Organization   Physicochemical Properties   Lipophilicity</p> <p>Water Solubility   Pharmacokinetics   Druglikeness   Source Organism   Biological Activity</p> <table border="1"> <tr><td>Gastrointestinal absorption</td><td>High</td></tr> <tr><td>BBB permeant</td><td>No</td></tr> <tr><td>Cytochrome P450 1A2 inhibitor</td><td>No</td></tr> <tr><td>Cytochrome P450 2C19 inhibitor</td><td>No</td></tr> <tr><td>Cytochrome P450 2C9 inhibitor</td><td>No</td></tr> <tr><td>Cytochrome P450 2D6 inhibitor</td><td>No</td></tr> <tr><td>Cytochrome P450 3A4 inhibitor</td><td>No</td></tr> <tr><td>Skin permeation</td><td>-8.73</td></tr> </table> <p>Gastrointestinal absorption: according to the white of the BOILED-Egg. For details please refer to this article: A BOILED-Egg to predict gastrointestinal absorption and brain penetration of small molecules. ChemMedChem (2016) 11(11):1117-1121.<br/>BBB permeant: Blood barrier brain permeation according to the yolk of the BOILED-Egg. For details please refer to this article: A BOILED-Egg to predict gastrointestinal absorption and brain penetration of small molecules. ChemMedChem (2016) 11(11):1117-1121.<br/>Cytochrome P450 1A2 inhibitor: SVM model built on 9145 molecules (training set) and tested on 3000 molecules (test set) 10-fold CV: ACC=0.83 / AUC=0.90 External: ACC=0.84 / AUC=0.91<br/>Cytochrome P450 2C19 inhibitor: SVM model built on 9272 molecules (training set) and tested on 3000 molecules (test set) 10-fold CV: ACC=0.80 / AUC=0.86 External: ACC=0.80 / AUC=0.87<br/>Cytochrome P450 2C9 inhibitor: SVM model built on 5940 molecules (training set) and tested on 2075 molecules (test set) 10-fold CV: ACC=0.78 / AUC=0.85 External: ACC=0.77 / AUC=0.81<br/>Cytochrome P450 2D6 inhibitor: SVM model built on 3664 molecules (training set) and tested on 1068 molecules (test set) 10-fold CV: ACC=0.79 / AUC=0.85 External: ACC=0.81 / AUC=0.87<br/>Cytochrome P450 3A4 inhibitor: SVM model built on 7518 molecules (training set) and tested on 2579 molecules (test set) 10-fold CV: ACC=0.77 / AUC=0.85 External: ACC=0.78 / AUC=0.86<br/>Skin permeation: QSPR model implemented from Potts RO and Guy RH. 1992 Pharm. Res.<br/>Calculated with SWISSADME (<a href="http://www.swissadme.ch">http://www.swissadme.ch</a>)</p> | Gastrointestinal absorption | High | BBB permeant         | No    | Cytochrome P450 1A2 inhibitor | No | Cytochrome P450 2C19 inhibitor | No | Cytochrome P450 2C9 inhibitor | No | Cytochrome P450 2D6 inhibitor | No | Cytochrome P450 3A4 inhibitor | No | Skin permeation | -8.73 |
| ESOL Log S                                                                                                                                                                                                                                                                                                                                                                                                                                                                                                                                                                                                                                                                                                                                                                                                                                                                                                                                                                                                                                                                                                                                                                                                                                                                                                                                                                                                                                                                                                                                                                                                                                                                                                                                                                             | 0.88                                |      |                                |     |                               |      |                                    |                |                                  |      |                              |      |                                                                                                                                                                                                                                                                                                                                                                                                                                                                                                                                                                                                                                                                                                                                                                                                                                                                                                                                                                                                                                                      |       |           |                |                                                                                                                                                                                                                                                                                                                                                                                                                                                                                                                                                                                                                                                                                                                                                                                                                                                                                                                                                                                                                                                                                                                                                                                                                                                                                                                                                                                                                                                                                                                                                 |       |                               |        |                               |       |                  |         |                                                                                                                                                                                                                                                                                                                                                                                                                                                                                                                                                                                                                                                                                                                                                                                                                                                                                                                                                                                                                                                                                                                                                                                                                                                                                                                                                                                                                                                                                                                                                                                                                                                                                                                                                                                                                                                                                                                                                                                                                                                                                                                                                                                                                                                                                                                                                                                                                                                                                                                                    |                             |      |                      |       |                               |    |                                |    |                               |    |                               |    |                               |    |                 |       |
| ESOL Solubility (mg/mL)                                                                                                                                                                                                                                                                                                                                                                                                                                                                                                                                                                                                                                                                                                                                                                                                                                                                                                                                                                                                                                                                                                                                                                                                                                                                                                                                                                                                                                                                                                                                                                                                                                                                                                                                                                | 981                                 |      |                                |     |                               |      |                                    |                |                                  |      |                              |      |                                                                                                                                                                                                                                                                                                                                                                                                                                                                                                                                                                                                                                                                                                                                                                                                                                                                                                                                                                                                                                                      |       |           |                |                                                                                                                                                                                                                                                                                                                                                                                                                                                                                                                                                                                                                                                                                                                                                                                                                                                                                                                                                                                                                                                                                                                                                                                                                                                                                                                                                                                                                                                                                                                                                 |       |                               |        |                               |       |                  |         |                                                                                                                                                                                                                                                                                                                                                                                                                                                                                                                                                                                                                                                                                                                                                                                                                                                                                                                                                                                                                                                                                                                                                                                                                                                                                                                                                                                                                                                                                                                                                                                                                                                                                                                                                                                                                                                                                                                                                                                                                                                                                                                                                                                                                                                                                                                                                                                                                                                                                                                                    |                             |      |                      |       |                               |    |                                |    |                               |    |                               |    |                               |    |                 |       |
| ESOL Solubility (mol/L)                                                                                                                                                                                                                                                                                                                                                                                                                                                                                                                                                                                                                                                                                                                                                                                                                                                                                                                                                                                                                                                                                                                                                                                                                                                                                                                                                                                                                                                                                                                                                                                                                                                                                                                                                                | 7.59                                |      |                                |     |                               |      |                                    |                |                                  |      |                              |      |                                                                                                                                                                                                                                                                                                                                                                                                                                                                                                                                                                                                                                                                                                                                                                                                                                                                                                                                                                                                                                                      |       |           |                |                                                                                                                                                                                                                                                                                                                                                                                                                                                                                                                                                                                                                                                                                                                                                                                                                                                                                                                                                                                                                                                                                                                                                                                                                                                                                                                                                                                                                                                                                                                                                 |       |                               |        |                               |       |                  |         |                                                                                                                                                                                                                                                                                                                                                                                                                                                                                                                                                                                                                                                                                                                                                                                                                                                                                                                                                                                                                                                                                                                                                                                                                                                                                                                                                                                                                                                                                                                                                                                                                                                                                                                                                                                                                                                                                                                                                                                                                                                                                                                                                                                                                                                                                                                                                                                                                                                                                                                                    |                             |      |                      |       |                               |    |                                |    |                               |    |                               |    |                               |    |                 |       |
| ESOL Class                                                                                                                                                                                                                                                                                                                                                                                                                                                                                                                                                                                                                                                                                                                                                                                                                                                                                                                                                                                                                                                                                                                                                                                                                                                                                                                                                                                                                                                                                                                                                                                                                                                                                                                                                                             | Highly soluble                      |      |                                |     |                               |      |                                    |                |                                  |      |                              |      |                                                                                                                                                                                                                                                                                                                                                                                                                                                                                                                                                                                                                                                                                                                                                                                                                                                                                                                                                                                                                                                      |       |           |                |                                                                                                                                                                                                                                                                                                                                                                                                                                                                                                                                                                                                                                                                                                                                                                                                                                                                                                                                                                                                                                                                                                                                                                                                                                                                                                                                                                                                                                                                                                                                                 |       |                               |        |                               |       |                  |         |                                                                                                                                                                                                                                                                                                                                                                                                                                                                                                                                                                                                                                                                                                                                                                                                                                                                                                                                                                                                                                                                                                                                                                                                                                                                                                                                                                                                                                                                                                                                                                                                                                                                                                                                                                                                                                                                                                                                                                                                                                                                                                                                                                                                                                                                                                                                                                                                                                                                                                                                    |                             |      |                      |       |                               |    |                                |    |                               |    |                               |    |                               |    |                 |       |
| ALI Log S                                                                                                                                                                                                                                                                                                                                                                                                                                                                                                                                                                                                                                                                                                                                                                                                                                                                                                                                                                                                                                                                                                                                                                                                                                                                                                                                                                                                                                                                                                                                                                                                                                                                                                                                                                              | 1.81                                |      |                                |     |                               |      |                                    |                |                                  |      |                              |      |                                                                                                                                                                                                                                                                                                                                                                                                                                                                                                                                                                                                                                                                                                                                                                                                                                                                                                                                                                                                                                                      |       |           |                |                                                                                                                                                                                                                                                                                                                                                                                                                                                                                                                                                                                                                                                                                                                                                                                                                                                                                                                                                                                                                                                                                                                                                                                                                                                                                                                                                                                                                                                                                                                                                 |       |                               |        |                               |       |                  |         |                                                                                                                                                                                                                                                                                                                                                                                                                                                                                                                                                                                                                                                                                                                                                                                                                                                                                                                                                                                                                                                                                                                                                                                                                                                                                                                                                                                                                                                                                                                                                                                                                                                                                                                                                                                                                                                                                                                                                                                                                                                                                                                                                                                                                                                                                                                                                                                                                                                                                                                                    |                             |      |                      |       |                               |    |                                |    |                               |    |                               |    |                               |    |                 |       |
| ALI Solubility (mg/mL)                                                                                                                                                                                                                                                                                                                                                                                                                                                                                                                                                                                                                                                                                                                                                                                                                                                                                                                                                                                                                                                                                                                                                                                                                                                                                                                                                                                                                                                                                                                                                                                                                                                                                                                                                                 | 8340                                |      |                                |     |                               |      |                                    |                |                                  |      |                              |      |                                                                                                                                                                                                                                                                                                                                                                                                                                                                                                                                                                                                                                                                                                                                                                                                                                                                                                                                                                                                                                                      |       |           |                |                                                                                                                                                                                                                                                                                                                                                                                                                                                                                                                                                                                                                                                                                                                                                                                                                                                                                                                                                                                                                                                                                                                                                                                                                                                                                                                                                                                                                                                                                                                                                 |       |                               |        |                               |       |                  |         |                                                                                                                                                                                                                                                                                                                                                                                                                                                                                                                                                                                                                                                                                                                                                                                                                                                                                                                                                                                                                                                                                                                                                                                                                                                                                                                                                                                                                                                                                                                                                                                                                                                                                                                                                                                                                                                                                                                                                                                                                                                                                                                                                                                                                                                                                                                                                                                                                                                                                                                                    |                             |      |                      |       |                               |    |                                |    |                               |    |                               |    |                               |    |                 |       |
| ALI Solubility (mol/L)                                                                                                                                                                                                                                                                                                                                                                                                                                                                                                                                                                                                                                                                                                                                                                                                                                                                                                                                                                                                                                                                                                                                                                                                                                                                                                                                                                                                                                                                                                                                                                                                                                                                                                                                                                 | 64.6                                |      |                                |     |                               |      |                                    |                |                                  |      |                              |      |                                                                                                                                                                                                                                                                                                                                                                                                                                                                                                                                                                                                                                                                                                                                                                                                                                                                                                                                                                                                                                                      |       |           |                |                                                                                                                                                                                                                                                                                                                                                                                                                                                                                                                                                                                                                                                                                                                                                                                                                                                                                                                                                                                                                                                                                                                                                                                                                                                                                                                                                                                                                                                                                                                                                 |       |                               |        |                               |       |                  |         |                                                                                                                                                                                                                                                                                                                                                                                                                                                                                                                                                                                                                                                                                                                                                                                                                                                                                                                                                                                                                                                                                                                                                                                                                                                                                                                                                                                                                                                                                                                                                                                                                                                                                                                                                                                                                                                                                                                                                                                                                                                                                                                                                                                                                                                                                                                                                                                                                                                                                                                                    |                             |      |                      |       |                               |    |                                |    |                               |    |                               |    |                               |    |                 |       |
| ALI Class                                                                                                                                                                                                                                                                                                                                                                                                                                                                                                                                                                                                                                                                                                                                                                                                                                                                                                                                                                                                                                                                                                                                                                                                                                                                                                                                                                                                                                                                                                                                                                                                                                                                                                                                                                              | Highly soluble                      |      |                                |     |                               |      |                                    |                |                                  |      |                              |      |                                                                                                                                                                                                                                                                                                                                                                                                                                                                                                                                                                                                                                                                                                                                                                                                                                                                                                                                                                                                                                                      |       |           |                |                                                                                                                                                                                                                                                                                                                                                                                                                                                                                                                                                                                                                                                                                                                                                                                                                                                                                                                                                                                                                                                                                                                                                                                                                                                                                                                                                                                                                                                                                                                                                 |       |                               |        |                               |       |                  |         |                                                                                                                                                                                                                                                                                                                                                                                                                                                                                                                                                                                                                                                                                                                                                                                                                                                                                                                                                                                                                                                                                                                                                                                                                                                                                                                                                                                                                                                                                                                                                                                                                                                                                                                                                                                                                                                                                                                                                                                                                                                                                                                                                                                                                                                                                                                                                                                                                                                                                                                                    |                             |      |                      |       |                               |    |                                |    |                               |    |                               |    |                               |    |                 |       |
| SILICOS-IT Log S                                                                                                                                                                                                                                                                                                                                                                                                                                                                                                                                                                                                                                                                                                                                                                                                                                                                                                                                                                                                                                                                                                                                                                                                                                                                                                                                                                                                                                                                                                                                                                                                                                                                                                                                                                       | -0.42                               |      |                                |     |                               |      |                                    |                |                                  |      |                              |      |                                                                                                                                                                                                                                                                                                                                                                                                                                                                                                                                                                                                                                                                                                                                                                                                                                                                                                                                                                                                                                                      |       |           |                |                                                                                                                                                                                                                                                                                                                                                                                                                                                                                                                                                                                                                                                                                                                                                                                                                                                                                                                                                                                                                                                                                                                                                                                                                                                                                                                                                                                                                                                                                                                                                 |       |                               |        |                               |       |                  |         |                                                                                                                                                                                                                                                                                                                                                                                                                                                                                                                                                                                                                                                                                                                                                                                                                                                                                                                                                                                                                                                                                                                                                                                                                                                                                                                                                                                                                                                                                                                                                                                                                                                                                                                                                                                                                                                                                                                                                                                                                                                                                                                                                                                                                                                                                                                                                                                                                                                                                                                                    |                             |      |                      |       |                               |    |                                |    |                               |    |                               |    |                               |    |                 |       |
| SILICOS-IT Solubility (mg/mL)                                                                                                                                                                                                                                                                                                                                                                                                                                                                                                                                                                                                                                                                                                                                                                                                                                                                                                                                                                                                                                                                                                                                                                                                                                                                                                                                                                                                                                                                                                                                                                                                                                                                                                                                                          | 48.5                                |      |                                |     |                               |      |                                    |                |                                  |      |                              |      |                                                                                                                                                                                                                                                                                                                                                                                                                                                                                                                                                                                                                                                                                                                                                                                                                                                                                                                                                                                                                                                      |       |           |                |                                                                                                                                                                                                                                                                                                                                                                                                                                                                                                                                                                                                                                                                                                                                                                                                                                                                                                                                                                                                                                                                                                                                                                                                                                                                                                                                                                                                                                                                                                                                                 |       |                               |        |                               |       |                  |         |                                                                                                                                                                                                                                                                                                                                                                                                                                                                                                                                                                                                                                                                                                                                                                                                                                                                                                                                                                                                                                                                                                                                                                                                                                                                                                                                                                                                                                                                                                                                                                                                                                                                                                                                                                                                                                                                                                                                                                                                                                                                                                                                                                                                                                                                                                                                                                                                                                                                                                                                    |                             |      |                      |       |                               |    |                                |    |                               |    |                               |    |                               |    |                 |       |
| SILICOS-IT Solubility (mol/L)                                                                                                                                                                                                                                                                                                                                                                                                                                                                                                                                                                                                                                                                                                                                                                                                                                                                                                                                                                                                                                                                                                                                                                                                                                                                                                                                                                                                                                                                                                                                                                                                                                                                                                                                                          | 0.376                               |      |                                |     |                               |      |                                    |                |                                  |      |                              |      |                                                                                                                                                                                                                                                                                                                                                                                                                                                                                                                                                                                                                                                                                                                                                                                                                                                                                                                                                                                                                                                      |       |           |                |                                                                                                                                                                                                                                                                                                                                                                                                                                                                                                                                                                                                                                                                                                                                                                                                                                                                                                                                                                                                                                                                                                                                                                                                                                                                                                                                                                                                                                                                                                                                                 |       |                               |        |                               |       |                  |         |                                                                                                                                                                                                                                                                                                                                                                                                                                                                                                                                                                                                                                                                                                                                                                                                                                                                                                                                                                                                                                                                                                                                                                                                                                                                                                                                                                                                                                                                                                                                                                                                                                                                                                                                                                                                                                                                                                                                                                                                                                                                                                                                                                                                                                                                                                                                                                                                                                                                                                                                    |                             |      |                      |       |                               |    |                                |    |                               |    |                               |    |                               |    |                 |       |
| SILICOS-IT Class                                                                                                                                                                                                                                                                                                                                                                                                                                                                                                                                                                                                                                                                                                                                                                                                                                                                                                                                                                                                                                                                                                                                                                                                                                                                                                                                                                                                                                                                                                                                                                                                                                                                                                                                                                       | Soluble                             |      |                                |     |                               |      |                                    |                |                                  |      |                              |      |                                                                                                                                                                                                                                                                                                                                                                                                                                                                                                                                                                                                                                                                                                                                                                                                                                                                                                                                                                                                                                                      |       |           |                |                                                                                                                                                                                                                                                                                                                                                                                                                                                                                                                                                                                                                                                                                                                                                                                                                                                                                                                                                                                                                                                                                                                                                                                                                                                                                                                                                                                                                                                                                                                                                 |       |                               |        |                               |       |                  |         |                                                                                                                                                                                                                                                                                                                                                                                                                                                                                                                                                                                                                                                                                                                                                                                                                                                                                                                                                                                                                                                                                                                                                                                                                                                                                                                                                                                                                                                                                                                                                                                                                                                                                                                                                                                                                                                                                                                                                                                                                                                                                                                                                                                                                                                                                                                                                                                                                                                                                                                                    |                             |      |                      |       |                               |    |                                |    |                               |    |                               |    |                               |    |                 |       |
| Gastrointestinal absorption                                                                                                                                                                                                                                                                                                                                                                                                                                                                                                                                                                                                                                                                                                                                                                                                                                                                                                                                                                                                                                                                                                                                                                                                                                                                                                                                                                                                                                                                                                                                                                                                                                                                                                                                                            | High                                |      |                                |     |                               |      |                                    |                |                                  |      |                              |      |                                                                                                                                                                                                                                                                                                                                                                                                                                                                                                                                                                                                                                                                                                                                                                                                                                                                                                                                                                                                                                                      |       |           |                |                                                                                                                                                                                                                                                                                                                                                                                                                                                                                                                                                                                                                                                                                                                                                                                                                                                                                                                                                                                                                                                                                                                                                                                                                                                                                                                                                                                                                                                                                                                                                 |       |                               |        |                               |       |                  |         |                                                                                                                                                                                                                                                                                                                                                                                                                                                                                                                                                                                                                                                                                                                                                                                                                                                                                                                                                                                                                                                                                                                                                                                                                                                                                                                                                                                                                                                                                                                                                                                                                                                                                                                                                                                                                                                                                                                                                                                                                                                                                                                                                                                                                                                                                                                                                                                                                                                                                                                                    |                             |      |                      |       |                               |    |                                |    |                               |    |                               |    |                               |    |                 |       |
| BBB permeant                                                                                                                                                                                                                                                                                                                                                                                                                                                                                                                                                                                                                                                                                                                                                                                                                                                                                                                                                                                                                                                                                                                                                                                                                                                                                                                                                                                                                                                                                                                                                                                                                                                                                                                                                                           | No                                  |      |                                |     |                               |      |                                    |                |                                  |      |                              |      |                                                                                                                                                                                                                                                                                                                                                                                                                                                                                                                                                                                                                                                                                                                                                                                                                                                                                                                                                                                                                                                      |       |           |                |                                                                                                                                                                                                                                                                                                                                                                                                                                                                                                                                                                                                                                                                                                                                                                                                                                                                                                                                                                                                                                                                                                                                                                                                                                                                                                                                                                                                                                                                                                                                                 |       |                               |        |                               |       |                  |         |                                                                                                                                                                                                                                                                                                                                                                                                                                                                                                                                                                                                                                                                                                                                                                                                                                                                                                                                                                                                                                                                                                                                                                                                                                                                                                                                                                                                                                                                                                                                                                                                                                                                                                                                                                                                                                                                                                                                                                                                                                                                                                                                                                                                                                                                                                                                                                                                                                                                                                                                    |                             |      |                      |       |                               |    |                                |    |                               |    |                               |    |                               |    |                 |       |
| Cytochrome P450 1A2 inhibitor                                                                                                                                                                                                                                                                                                                                                                                                                                                                                                                                                                                                                                                                                                                                                                                                                                                                                                                                                                                                                                                                                                                                                                                                                                                                                                                                                                                                                                                                                                                                                                                                                                                                                                                                                          | No                                  |      |                                |     |                               |      |                                    |                |                                  |      |                              |      |                                                                                                                                                                                                                                                                                                                                                                                                                                                                                                                                                                                                                                                                                                                                                                                                                                                                                                                                                                                                                                                      |       |           |                |                                                                                                                                                                                                                                                                                                                                                                                                                                                                                                                                                                                                                                                                                                                                                                                                                                                                                                                                                                                                                                                                                                                                                                                                                                                                                                                                                                                                                                                                                                                                                 |       |                               |        |                               |       |                  |         |                                                                                                                                                                                                                                                                                                                                                                                                                                                                                                                                                                                                                                                                                                                                                                                                                                                                                                                                                                                                                                                                                                                                                                                                                                                                                                                                                                                                                                                                                                                                                                                                                                                                                                                                                                                                                                                                                                                                                                                                                                                                                                                                                                                                                                                                                                                                                                                                                                                                                                                                    |                             |      |                      |       |                               |    |                                |    |                               |    |                               |    |                               |    |                 |       |
| Cytochrome P450 2C19 inhibitor                                                                                                                                                                                                                                                                                                                                                                                                                                                                                                                                                                                                                                                                                                                                                                                                                                                                                                                                                                                                                                                                                                                                                                                                                                                                                                                                                                                                                                                                                                                                                                                                                                                                                                                                                         | No                                  |      |                                |     |                               |      |                                    |                |                                  |      |                              |      |                                                                                                                                                                                                                                                                                                                                                                                                                                                                                                                                                                                                                                                                                                                                                                                                                                                                                                                                                                                                                                                      |       |           |                |                                                                                                                                                                                                                                                                                                                                                                                                                                                                                                                                                                                                                                                                                                                                                                                                                                                                                                                                                                                                                                                                                                                                                                                                                                                                                                                                                                                                                                                                                                                                                 |       |                               |        |                               |       |                  |         |                                                                                                                                                                                                                                                                                                                                                                                                                                                                                                                                                                                                                                                                                                                                                                                                                                                                                                                                                                                                                                                                                                                                                                                                                                                                                                                                                                                                                                                                                                                                                                                                                                                                                                                                                                                                                                                                                                                                                                                                                                                                                                                                                                                                                                                                                                                                                                                                                                                                                                                                    |                             |      |                      |       |                               |    |                                |    |                               |    |                               |    |                               |    |                 |       |
| Cytochrome P450 2C9 inhibitor                                                                                                                                                                                                                                                                                                                                                                                                                                                                                                                                                                                                                                                                                                                                                                                                                                                                                                                                                                                                                                                                                                                                                                                                                                                                                                                                                                                                                                                                                                                                                                                                                                                                                                                                                          | No                                  |      |                                |     |                               |      |                                    |                |                                  |      |                              |      |                                                                                                                                                                                                                                                                                                                                                                                                                                                                                                                                                                                                                                                                                                                                                                                                                                                                                                                                                                                                                                                      |       |           |                |                                                                                                                                                                                                                                                                                                                                                                                                                                                                                                                                                                                                                                                                                                                                                                                                                                                                                                                                                                                                                                                                                                                                                                                                                                                                                                                                                                                                                                                                                                                                                 |       |                               |        |                               |       |                  |         |                                                                                                                                                                                                                                                                                                                                                                                                                                                                                                                                                                                                                                                                                                                                                                                                                                                                                                                                                                                                                                                                                                                                                                                                                                                                                                                                                                                                                                                                                                                                                                                                                                                                                                                                                                                                                                                                                                                                                                                                                                                                                                                                                                                                                                                                                                                                                                                                                                                                                                                                    |                             |      |                      |       |                               |    |                                |    |                               |    |                               |    |                               |    |                 |       |
| Cytochrome P450 2D6 inhibitor                                                                                                                                                                                                                                                                                                                                                                                                                                                                                                                                                                                                                                                                                                                                                                                                                                                                                                                                                                                                                                                                                                                                                                                                                                                                                                                                                                                                                                                                                                                                                                                                                                                                                                                                                          | No                                  |      |                                |     |                               |      |                                    |                |                                  |      |                              |      |                                                                                                                                                                                                                                                                                                                                                                                                                                                                                                                                                                                                                                                                                                                                                                                                                                                                                                                                                                                                                                                      |       |           |                |                                                                                                                                                                                                                                                                                                                                                                                                                                                                                                                                                                                                                                                                                                                                                                                                                                                                                                                                                                                                                                                                                                                                                                                                                                                                                                                                                                                                                                                                                                                                                 |       |                               |        |                               |       |                  |         |                                                                                                                                                                                                                                                                                                                                                                                                                                                                                                                                                                                                                                                                                                                                                                                                                                                                                                                                                                                                                                                                                                                                                                                                                                                                                                                                                                                                                                                                                                                                                                                                                                                                                                                                                                                                                                                                                                                                                                                                                                                                                                                                                                                                                                                                                                                                                                                                                                                                                                                                    |                             |      |                      |       |                               |    |                                |    |                               |    |                               |    |                               |    |                 |       |
| Cytochrome P450 3A4 inhibitor                                                                                                                                                                                                                                                                                                                                                                                                                                                                                                                                                                                                                                                                                                                                                                                                                                                                                                                                                                                                                                                                                                                                                                                                                                                                                                                                                                                                                                                                                                                                                                                                                                                                                                                                                          | No                                  |      |                                |     |                               |      |                                    |                |                                  |      |                              |      |                                                                                                                                                                                                                                                                                                                                                                                                                                                                                                                                                                                                                                                                                                                                                                                                                                                                                                                                                                                                                                                      |       |           |                |                                                                                                                                                                                                                                                                                                                                                                                                                                                                                                                                                                                                                                                                                                                                                                                                                                                                                                                                                                                                                                                                                                                                                                                                                                                                                                                                                                                                                                                                                                                                                 |       |                               |        |                               |       |                  |         |                                                                                                                                                                                                                                                                                                                                                                                                                                                                                                                                                                                                                                                                                                                                                                                                                                                                                                                                                                                                                                                                                                                                                                                                                                                                                                                                                                                                                                                                                                                                                                                                                                                                                                                                                                                                                                                                                                                                                                                                                                                                                                                                                                                                                                                                                                                                                                                                                                                                                                                                    |                             |      |                      |       |                               |    |                                |    |                               |    |                               |    |                               |    |                 |       |
| Skin permeation                                                                                                                                                                                                                                                                                                                                                                                                                                                                                                                                                                                                                                                                                                                                                                                                                                                                                                                                                                                                                                                                                                                                                                                                                                                                                                                                                                                                                                                                                                                                                                                                                                                                                                                                                                        | -8.73                               |      |                                |     |                               |      |                                    |                |                                  |      |                              |      |                                                                                                                                                                                                                                                                                                                                                                                                                                                                                                                                                                                                                                                                                                                                                                                                                                                                                                                                                                                                                                                      |       |           |                |                                                                                                                                                                                                                                                                                                                                                                                                                                                                                                                                                                                                                                                                                                                                                                                                                                                                                                                                                                                                                                                                                                                                                                                                                                                                                                                                                                                                                                                                                                                                                 |       |                               |        |                               |       |                  |         |                                                                                                                                                                                                                                                                                                                                                                                                                                                                                                                                                                                                                                                                                                                                                                                                                                                                                                                                                                                                                                                                                                                                                                                                                                                                                                                                                                                                                                                                                                                                                                                                                                                                                                                                                                                                                                                                                                                                                                                                                                                                                                                                                                                                                                                                                                                                                                                                                                                                                                                                    |                             |      |                      |       |                               |    |                                |    |                               |    |                               |    |                               |    |                 |       |
| <p><b>E</b></p> <p>L-Pipecolate<br/>Pipecolic acid<br/>Pipecolic acid<br/>2-Piperidinecarboxylic acid<br/>(S)-Piperidine-2-carboxylic acid</p> <p>External Links   Hierarchical Organization   Physicochemical Properties   Lipophilicity</p> <p>Water Solubility   Pharmacokinetics   Druglikeness   Source Organism   Biological Activity</p> <table border="1"> <tr><td>Lipinski (Pfizer) filter violations</td><td>0</td></tr> <tr><td>Ghose filter violations</td><td>2</td></tr> <tr><td>Veber (GSK) filter violations</td><td>0</td></tr> <tr><td>Egan (Pharmacia) filter violations</td><td>0</td></tr> <tr><td>Muegge (Bayer) filter violations</td><td>2</td></tr> <tr><td>Abbott Bioavailability Score</td><td>0.55</td></tr> </table> <p>Lipinski (Pfizer) filter violations: implemented from Lipinski CA. et al. 2001 Adv. Drug Deliv. Rev. MW ≤ 500 MLOGP ≤ 4.15 N or O ≤ 10 NH or OH ≤ 5<br/>Ghose filter violations: implemented from Ghose AK. et al. 1999 J. Comb. Chem. 160 ≤ MW ≤ 480 -0.4 ≤ WLOGP ≤ 5.6 40 ≤ MR ≤ 130 20 ≤ atoms ≤ 70<br/>Veber (GSK) filter violations: implemented from Veber DF. et al. 2002 J. Med. Chem. Rotatable bonds ≤ 10 TPSA ≤ 140<br/>Egan (Pharmacia) filter violations: implemented from Egan WJ. et al. 2000 J. Med. Chem. WLOGP ≤ 5.88 TPSA ≤ 131.6<br/>Muegge (Bayer) filter violations: implemented from Muegge I. et al. 2001 J. Med. Chem. 200 ≤ MW ≤ 600 -2 ≤ XLOGP ≤ 5 TPSA ≤ 150 Num. rings ≤ 7 Num. carbon &gt; 4 Num. heteroatoms &gt; 1 Num. rotatable bonds ≤ 15 H-bond acc. ≤ 10 H-bond don. ≤ 5<br/>Abbott Bioavailability Score: Probability of F &gt; 10% in rat implemented from Martin YC. 2005 J. Med. Chem.<br/>Calculated with SWISSADME (<a href="http://www.swissadme.ch">http://www.swissadme.ch</a>)</p> | Lipinski (Pfizer) filter violations | 0    | Ghose filter violations        | 2   | Veber (GSK) filter violations | 0    | Egan (Pharmacia) filter violations | 0              | Muegge (Bayer) filter violations | 2    | Abbott Bioavailability Score | 0.55 | <p><b>E</b></p> <p>Lipinski (Pfizer) filter violations: implemented from Lipinski CA. et al. 2001 Adv. Drug Deliv. Rev. MW ≤ 500 MLOGP ≤ 4.15 N or O ≤ 10 NH or OH ≤ 5<br/>Ghose filter violations: implemented from Ghose AK. et al. 1999 J. Comb. Chem. 160 ≤ MW ≤ 480 -0.4 ≤ WLOGP ≤ 5.6 40 ≤ MR ≤ 130 20 ≤ atoms ≤ 70<br/>Veber (GSK) filter violations: implemented from Veber DF. et al. 2002 J. Med. Chem. Rotatable bonds ≤ 10 TPSA ≤ 140<br/>Egan (Pharmacia) filter violations: implemented from Egan WJ. et al. 2000 J. Med. Chem. WLOGP ≤ 5.88 TPSA ≤ 131.6<br/>Muegge (Bayer) filter violations: implemented from Muegge I. et al. 2001 J. Med. Chem. 200 ≤ MW ≤ 600 -2 ≤ XLOGP ≤ 5 TPSA ≤ 150 Num. rings ≤ 7 Num. carbon &gt; 4 Num. heteroatoms &gt; 1 Num. rotatable bonds ≤ 15 H-bond acc. ≤ 10 H-bond don. ≤ 5<br/>Abbott Bioavailability Score: Probability of F &gt; 10% in rat implemented from Martin YC. 2005 J. Med. Chem.<br/>Calculated with SWISSADME (<a href="http://www.swissadme.ch">http://www.swissadme.ch</a>)</p> |       |           |                |                                                                                                                                                                                                                                                                                                                                                                                                                                                                                                                                                                                                                                                                                                                                                                                                                                                                                                                                                                                                                                                                                                                                                                                                                                                                                                                                                                                                                                                                                                                                                 |       |                               |        |                               |       |                  |         |                                                                                                                                                                                                                                                                                                                                                                                                                                                                                                                                                                                                                                                                                                                                                                                                                                                                                                                                                                                                                                                                                                                                                                                                                                                                                                                                                                                                                                                                                                                                                                                                                                                                                                                                                                                                                                                                                                                                                                                                                                                                                                                                                                                                                                                                                                                                                                                                                                                                                                                                    |                             |      |                      |       |                               |    |                                |    |                               |    |                               |    |                               |    |                 |       |
| Lipinski (Pfizer) filter violations                                                                                                                                                                                                                                                                                                                                                                                                                                                                                                                                                                                                                                                                                                                                                                                                                                                                                                                                                                                                                                                                                                                                                                                                                                                                                                                                                                                                                                                                                                                                                                                                                                                                                                                                                    | 0                                   |      |                                |     |                               |      |                                    |                |                                  |      |                              |      |                                                                                                                                                                                                                                                                                                                                                                                                                                                                                                                                                                                                                                                                                                                                                                                                                                                                                                                                                                                                                                                      |       |           |                |                                                                                                                                                                                                                                                                                                                                                                                                                                                                                                                                                                                                                                                                                                                                                                                                                                                                                                                                                                                                                                                                                                                                                                                                                                                                                                                                                                                                                                                                                                                                                 |       |                               |        |                               |       |                  |         |                                                                                                                                                                                                                                                                                                                                                                                                                                                                                                                                                                                                                                                                                                                                                                                                                                                                                                                                                                                                                                                                                                                                                                                                                                                                                                                                                                                                                                                                                                                                                                                                                                                                                                                                                                                                                                                                                                                                                                                                                                                                                                                                                                                                                                                                                                                                                                                                                                                                                                                                    |                             |      |                      |       |                               |    |                                |    |                               |    |                               |    |                               |    |                 |       |
| Ghose filter violations                                                                                                                                                                                                                                                                                                                                                                                                                                                                                                                                                                                                                                                                                                                                                                                                                                                                                                                                                                                                                                                                                                                                                                                                                                                                                                                                                                                                                                                                                                                                                                                                                                                                                                                                                                | 2                                   |      |                                |     |                               |      |                                    |                |                                  |      |                              |      |                                                                                                                                                                                                                                                                                                                                                                                                                                                                                                                                                                                                                                                                                                                                                                                                                                                                                                                                                                                                                                                      |       |           |                |                                                                                                                                                                                                                                                                                                                                                                                                                                                                                                                                                                                                                                                                                                                                                                                                                                                                                                                                                                                                                                                                                                                                                                                                                                                                                                                                                                                                                                                                                                                                                 |       |                               |        |                               |       |                  |         |                                                                                                                                                                                                                                                                                                                                                                                                                                                                                                                                                                                                                                                                                                                                                                                                                                                                                                                                                                                                                                                                                                                                                                                                                                                                                                                                                                                                                                                                                                                                                                                                                                                                                                                                                                                                                                                                                                                                                                                                                                                                                                                                                                                                                                                                                                                                                                                                                                                                                                                                    |                             |      |                      |       |                               |    |                                |    |                               |    |                               |    |                               |    |                 |       |
| Veber (GSK) filter violations                                                                                                                                                                                                                                                                                                                                                                                                                                                                                                                                                                                                                                                                                                                                                                                                                                                                                                                                                                                                                                                                                                                                                                                                                                                                                                                                                                                                                                                                                                                                                                                                                                                                                                                                                          | 0                                   |      |                                |     |                               |      |                                    |                |                                  |      |                              |      |                                                                                                                                                                                                                                                                                                                                                                                                                                                                                                                                                                                                                                                                                                                                                                                                                                                                                                                                                                                                                                                      |       |           |                |                                                                                                                                                                                                                                                                                                                                                                                                                                                                                                                                                                                                                                                                                                                                                                                                                                                                                                                                                                                                                                                                                                                                                                                                                                                                                                                                                                                                                                                                                                                                                 |       |                               |        |                               |       |                  |         |                                                                                                                                                                                                                                                                                                                                                                                                                                                                                                                                                                                                                                                                                                                                                                                                                                                                                                                                                                                                                                                                                                                                                                                                                                                                                                                                                                                                                                                                                                                                                                                                                                                                                                                                                                                                                                                                                                                                                                                                                                                                                                                                                                                                                                                                                                                                                                                                                                                                                                                                    |                             |      |                      |       |                               |    |                                |    |                               |    |                               |    |                               |    |                 |       |
| Egan (Pharmacia) filter violations                                                                                                                                                                                                                                                                                                                                                                                                                                                                                                                                                                                                                                                                                                                                                                                                                                                                                                                                                                                                                                                                                                                                                                                                                                                                                                                                                                                                                                                                                                                                                                                                                                                                                                                                                     | 0                                   |      |                                |     |                               |      |                                    |                |                                  |      |                              |      |                                                                                                                                                                                                                                                                                                                                                                                                                                                                                                                                                                                                                                                                                                                                                                                                                                                                                                                                                                                                                                                      |       |           |                |                                                                                                                                                                                                                                                                                                                                                                                                                                                                                                                                                                                                                                                                                                                                                                                                                                                                                                                                                                                                                                                                                                                                                                                                                                                                                                                                                                                                                                                                                                                                                 |       |                               |        |                               |       |                  |         |                                                                                                                                                                                                                                                                                                                                                                                                                                                                                                                                                                                                                                                                                                                                                                                                                                                                                                                                                                                                                                                                                                                                                                                                                                                                                                                                                                                                                                                                                                                                                                                                                                                                                                                                                                                                                                                                                                                                                                                                                                                                                                                                                                                                                                                                                                                                                                                                                                                                                                                                    |                             |      |                      |       |                               |    |                                |    |                               |    |                               |    |                               |    |                 |       |
| Muegge (Bayer) filter violations                                                                                                                                                                                                                                                                                                                                                                                                                                                                                                                                                                                                                                                                                                                                                                                                                                                                                                                                                                                                                                                                                                                                                                                                                                                                                                                                                                                                                                                                                                                                                                                                                                                                                                                                                       | 2                                   |      |                                |     |                               |      |                                    |                |                                  |      |                              |      |                                                                                                                                                                                                                                                                                                                                                                                                                                                                                                                                                                                                                                                                                                                                                                                                                                                                                                                                                                                                                                                      |       |           |                |                                                                                                                                                                                                                                                                                                                                                                                                                                                                                                                                                                                                                                                                                                                                                                                                                                                                                                                                                                                                                                                                                                                                                                                                                                                                                                                                                                                                                                                                                                                                                 |       |                               |        |                               |       |                  |         |                                                                                                                                                                                                                                                                                                                                                                                                                                                                                                                                                                                                                                                                                                                                                                                                                                                                                                                                                                                                                                                                                                                                                                                                                                                                                                                                                                                                                                                                                                                                                                                                                                                                                                                                                                                                                                                                                                                                                                                                                                                                                                                                                                                                                                                                                                                                                                                                                                                                                                                                    |                             |      |                      |       |                               |    |                                |    |                               |    |                               |    |                               |    |                 |       |
| Abbott Bioavailability Score                                                                                                                                                                                                                                                                                                                                                                                                                                                                                                                                                                                                                                                                                                                                                                                                                                                                                                                                                                                                                                                                                                                                                                                                                                                                                                                                                                                                                                                                                                                                                                                                                                                                                                                                                           | 0.55                                |      |                                |     |                               |      |                                    |                |                                  |      |                              |      |                                                                                                                                                                                                                                                                                                                                                                                                                                                                                                                                                                                                                                                                                                                                                                                                                                                                                                                                                                                                                                                      |       |           |                |                                                                                                                                                                                                                                                                                                                                                                                                                                                                                                                                                                                                                                                                                                                                                                                                                                                                                                                                                                                                                                                                                                                                                                                                                                                                                                                                                                                                                                                                                                                                                 |       |                               |        |                               |       |                  |         |                                                                                                                                                                                                                                                                                                                                                                                                                                                                                                                                                                                                                                                                                                                                                                                                                                                                                                                                                                                                                                                                                                                                                                                                                                                                                                                                                                                                                                                                                                                                                                                                                                                                                                                                                                                                                                                                                                                                                                                                                                                                                                                                                                                                                                                                                                                                                                                                                                                                                                                                    |                             |      |                      |       |                               |    |                                |    |                               |    |                               |    |                               |    |                 |       |

**Figure S3.** Record for the L-Pipecolate alkaloid is shown with the physicochemical and pharmaceutical properties calculated with SwissADME server (A-E).

| L-Pipecolate<br>Pipecolic acid<br>Pipecolic acid<br>2-Piperidinecarboxylic acid<br>(S)-Piperidine-2-carboxylic acid                                                                                                                                                              |                   |                      |            | A                                                                                                 | L-Pipecolate<br>Pipecolic acid<br>Pipecolic acid<br>2-Piperidinecarboxylic acid<br>(S)-Piperidine-2-carboxylic acid                                                                |                |               |                           | B |
|----------------------------------------------------------------------------------------------------------------------------------------------------------------------------------------------------------------------------------------------------------------------------------|-------------------|----------------------|------------|---------------------------------------------------------------------------------------------------|------------------------------------------------------------------------------------------------------------------------------------------------------------------------------------|----------------|---------------|---------------------------|---|
| <a href="#">External Links</a> <a href="#">Hierarchical Organization</a> <a href="#">Physicochemical Properties</a> <a href="#">Lipophilicity</a> <a href="#">Water Solubility</a> <a href="#">Pharmacokinetics</a> <a href="#">Druglikeness</a> <a href="#">Source Organism</a> |                   |                      |            |                                                                                                   | <a href="#">External Links</a> <a href="#">Hierarchical Organization</a> <a href="#">Physicochemical Properties</a> <a href="#">Lipophilicity</a> <a href="#">Water Solubility</a> |                |               |                           |   |
| Biological Activity                                                                                                                                                                                                                                                              |                   |                      |            |                                                                                                   | Pharmacokinetics Druglikeness Source Organism Biological Activity                                                                                                                  |                |               |                           |   |
| Kingdom                                                                                                                                                                                                                                                                          | Family            | Species              | Reference  |                                                                                                   | Target                                                                                                                                                                             | Target Type    | ChEMBL ID     | Reference                 |   |
| Fungi                                                                                                                                                                                                                                                                            | Arthrodermataceae | Arthroderma otae     | CB5113488  | D.Cook et al., <i>63 Gene Genomes Genetics</i> , 7, (2017), 1791-1797                             | Perisomal sarcosine oxidase                                                                                                                                                        | SINGLE PROTEIN | ChEMBL2254    | 10.1021/jp968331f         |   |
| Fungi                                                                                                                                                                                                                                                                            | Arthrodermataceae | Trichophyton equinum | CB5127.97  | D.Cook et al., <i>63 Gene Genomes Genetics</i> , 7, (2017), 1791-1797                             | Proton-coupled amino acid transporter 1                                                                                                                                            | SINGLE PROTEIN | ChEMBL1914279 | 10.1016/j.bmc.2011.08.058 |   |
| Fungi                                                                                                                                                                                                                                                                            | Dothideomycetes   | Alternaria oxyptris  | Raft River | D.Cook et al., <i>63 Gene Genomes Genetics</i> , 7, (2017), 1791-1797                             |                                                                                                                                                                                    |                |               |                           |   |
| Fungi                                                                                                                                                                                                                                                                            | Incertae sedis    | Phoma medicaginis    |            | Fan, Din., et al., <i>PLoS One</i> , 13, (2018), e0286641                                         |                                                                                                                                                                                    |                |               |                           |   |
| Plantae                                                                                                                                                                                                                                                                          | Araceae           | Lemna gibba          |            | Fujisaka, <i>Plant Cell Physiol.</i> , 28, (1987), 995                                            |                                                                                                                                                                                    |                |               |                           |   |
| Plantae                                                                                                                                                                                                                                                                          | Araceae           | Lemna gibba          |            | Fujisaka, <i>Plant Cell Physiol.</i> , 33, (1992), 419                                            |                                                                                                                                                                                    |                |               |                           |   |
| Plantae                                                                                                                                                                                                                                                                          | Araceae           | Lemna paucicostata   |            | Fujisaka, <i>Plant Cell Physiol.</i> , 33, (1992), 419                                            |                                                                                                                                                                                    |                |               |                           |   |
| Plantae                                                                                                                                                                                                                                                                          | Fabaceae          | Phaseolus vulgaris   |            | Harborne, <i>Phytochemical Dictionary Second Edition</i> , Taylor and Francis, (1999), Chapter 18 |                                                                                                                                                                                    |                |               |                           |   |
| Plantae                                                                                                                                                                                                                                                                          | Fagaceae          | Castanea sativa      |            | Servillo, L. et al., <i>Food Chem.</i> , 106, (2016), 1381-1389.                                  |                                                                                                                                                                                    |                |               |                           |   |

Source: KINQSDAR ([http://www.kinqsadfamily.com/kinqsad\\_cmfhp.php](http://www.kinqsadfamily.com/kinqsad_cmfhp.php))

Source: ChEMBL (<https://www.ebi.ac.uk/chembl/>)

**Figure S4.** Record for the L-Pipecolate alkaloid is shown with the source organism (A) and biological activity (B).

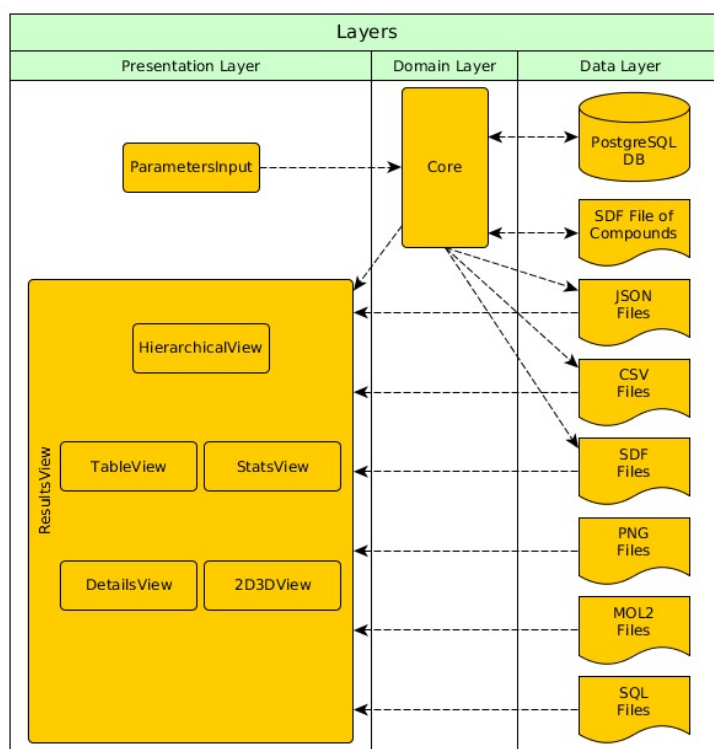

**Figure S5.** The architecture of the solution and the essential components of PSC-db. It consists of three main layers: the presentation, domain, and data layers, representing the interaction between the essential components of the solution.

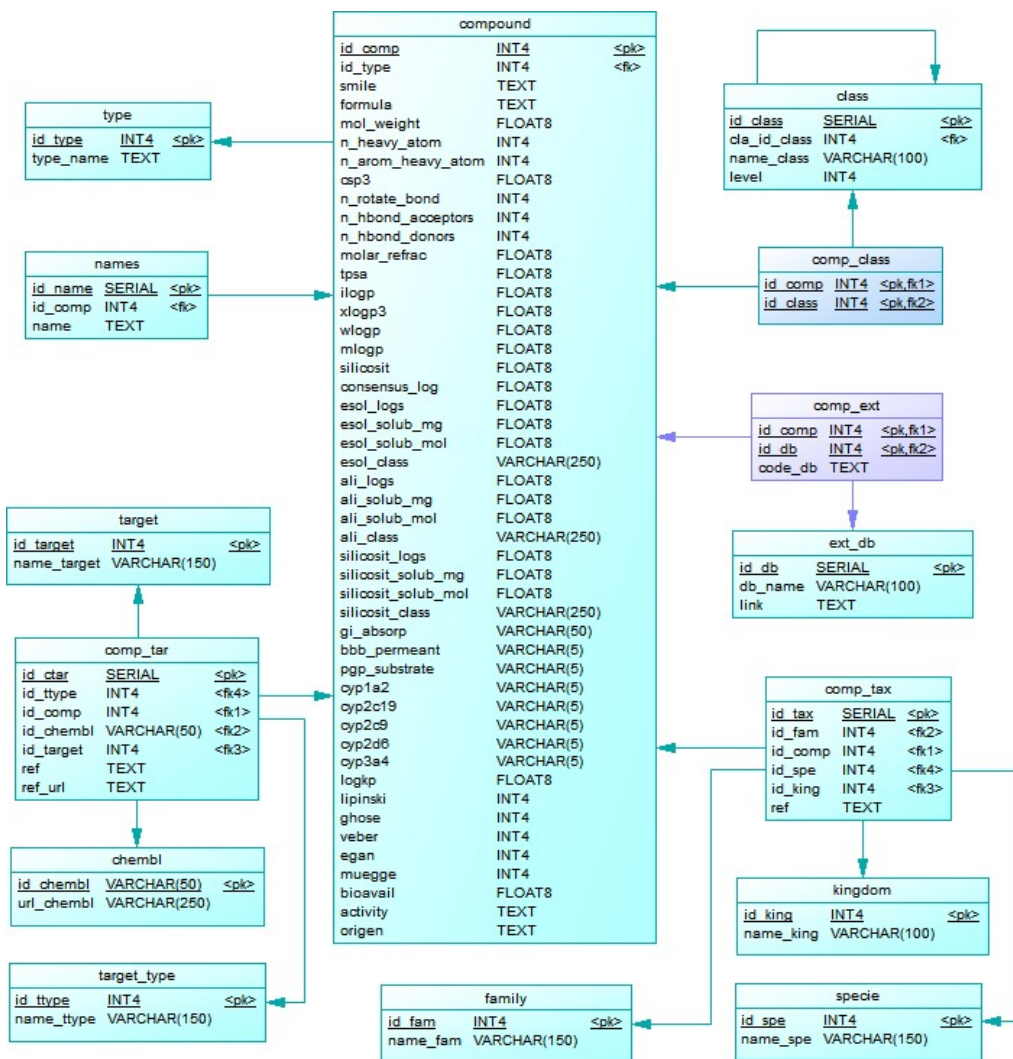

Figure S6. Physical data model implemented on PSC-db.
